# Supplementary material for: Structure and Implementation of Novel Task Rules: A Cross-Sectional Developmental Study
Source: PubMed Central journal article supplement (PMC6247441; doi:10.1177/0956797618755322), 2018-05-10
Supplement: VerbruggenFigS1.pdf [file VerbruggenFigS1.pdf]

## Appendix: Task instructions.

In the morning you need to take them to school on the left side of the street.

You must do this by pressing ◀ with your left hand



**After school, your friends need to get home as soon as possible.**  
If it is too dark outside, they may lose their way and their mum will become really worried!



Some live on the left side of the street, so you need to press ◀

Some live on the right side of the street, so you need to press ▶

This picture shows you which side of the street two of your friends live on.  
Dusty Dog lives on the left side.  
Barnaby Bear lives on the right side.



So you need to press ◀ with your left finger when you see Dusty Dog and ▶ with your right finger when you see Barnaby Bear

There are lots of friends in Coggel Land.  
At the beginning of each mini-game we will show you which friend lives on the left side of the street (◀) and which friend lives on the right side of the street (▶).



For each mini-game you must remember really well where your friends live and make sure they get home as quickly as possible. Otherwise, they may lose their way.

At the end of each mini-game the Coggel Land clock will show you how quickly you got your friends home.

The clock shows the time it took in black and any mistakes (if you pressed the wrong key) in red.

The best times will have a clock with some black, lots of white, and no red.



If you pressed the wrong key, you will hear:  
oops...



If you beat the time from the previous game, you will hear:  
YIHA!



Try to beat your own time!  
You can do this by bringing your friends to their home as quickly as possible.

*How quickly you bring your friend to school does not influence the time.*

Overview:

DAY (light): Everybody goes to school (press ◀)

EVENING (dark): Everybody goes home (press ◀ or ▶)

| Example 1                                                                           | Example 2                                                                           | Example 3                                                                           | Example 4                                                                           |
|-------------------------------------------------------------------------------------|-------------------------------------------------------------------------------------|-------------------------------------------------------------------------------------|-------------------------------------------------------------------------------------|
|  |  |  |  |

Overview:

We will show the instructions at the beginning of each mini-game.

You can start each game by pressing a key (but you have to wait at least three seconds).

We will start with three short 'practice' games, followed by 48 games for real.

Good luck!
