# Supplementary material for: Structure and Implementation of Novel Task Rules: A Cross-Sectional Developmental Study
Source: PubMed Central journal article supplement (PMC6247441; doi:10.1177/0956797618755322), 2018-05-10
Supplement: VerbruggenSupplementalMaterial.pdf [file VerbruggenSupplementalMaterial.pdf]

## SUPPLEMENTARY MATERIALS

### Analyses with all subjects and miniblocks included

In the analysis reported in the main manuscript, we excluded 5 subjects who did not complete the experiment, and 7 subjects who made more than 40% errors in the GO phase. For the NEXT analyses, we also excluded all miniblocks in which subjects made a GO error. In Table S1, we report the inferential statistics when all subjects and miniblocks are included. As can be seen, the results are very similar to the results reported in the main manuscript.

**Table S1:** Overview of the ANOVAs used to explore the effect of age, compatibility (NEXT) and trial number (GO1 or GO2) on performance. Age was a continuous numerical variable; thus,  $df_1 = 1$ . For two subjects (who were excluded from the analyses reported in the main manuscript), we did not have NEXT RT data after the RT trimming.

|                                | <i>Df</i> | <i>Sum of squares effect</i> | <i>Sum of squares error</i> | <i>F</i> | <i>p</i> | <i>generalized <math>\eta^2</math></i> |
|--------------------------------|-----------|------------------------------|-----------------------------|----------|----------|----------------------------------------|
| NEXT accuracy                  |           |                              |                             |          |          |                                        |
| Age                            | 1,206     | 0.005                        | 1.440                       | 0.740    | .391     | 0.002                                  |
| Compatibility                  | 1,206     | 0.776                        | 1.185                       | 134.925  | < .001   | 0.228                                  |
| Age x Compatibility            | 1,206     | 0.001                        | 1.185                       | 0.177    | .675     | 0.000                                  |
| NEXT RT<br>(all NEXT included) |           |                              |                             |          |          |                                        |
| Age                            | 1,204     | 71731219                     | 152346085                   | 96.052   | < .001   | 0.305                                  |
| Compatibility                  | 1,204     | 4083022                      | 10830441                    | 76.907   | < .001   | 0.024                                  |
| Age x Compatibility            | 1,204     | 403846                       | 10830441                    | 7.607    | .006     | 0.002                                  |
| NEXT RT<br>(correct NEXT only) |           |                              |                             |          |          |                                        |
| Age                            | 1,204     | 63278141                     | 133625697                   | 96.604   | < .001   | 0.306                                  |
| Compatibility                  | 1,204     | 1541188                      | 9579202                     | 32.821   | < .001   | 0.011                                  |
| Age x Compatibility            | 1,204     | 157680                       | 9579202                     | 3.358    | .068     | 0.001                                  |
| GO accuracy                    |           |                              |                             |          |          |                                        |
| Age                            | 1,206     | 0.709                        | 3.942                       | 37.070   | < .001   | 0.141                                  |
| Trial Number                   | 1,206     | 0.025                        | 0.385                       | 13.405   | < .001   | 0.006                                  |
| Age x Trial Number             | 1,206     | 0.001                        | 0.385                       | 0.295    | .588     | 0.000                                  |
| GO RT                          |           |                              |                             |          |          |                                        |
| Age                            | 1,206     | 48182914                     | 81816934                    | 121.316  | < .001   | 0.339                                  |
| Trial Number                   | 1,206     | 12275878                     | 12055967                    | 209.758  | < .001   | 0.116                                  |
| Age x Trial Number             | 1,206     | 2874675                      | 12055967                    | 49.119   | < .001   | 0.030                                  |

### Analyses of proportional interference-based scores

We reanalyzed the NEXT RT data using proportional interference-based scores. More specifically, for each subject, we divided mean RT for incompatible NEXT trials by mean RT for compatible NEXT trials. Scores > 1 indicate an interference effect. The descriptive and inferential statistics appear in Tables S2 and S3, respectively.

As can be seen in Table S2, the mean proportional scores were larger than 1 for all age groups. Although the largest value was observed for the 4-year olds, the 95%

## SUPPLEMENTARY MATERIALS

confidence interval included 1, which is presumably due to the high variability and low N. Importantly, we again failed to find an increase in instruction-based interference with age, which is inconsistent with the advance-implementation account (see the manuscript).

The raw RT analyses with all NEXT trials included revealed a decrease in the NEXT effect. This decrease was not observed in the proportional analyses. Proportional scores are sometimes used to control for general differences in RT. However, these scores (and other related transformation procedures) should be interpreted with caution as well. Acting or responding to a stimulus involves various cognitive mechanisms or processing steps (e.g. detecting the stimulus, selecting the appropriate response, executing the response; Verbruggen, McLaren, Chambers, 2014). Transforming the data could ‘inflate’ or ‘deflate’ the effect of interest if not all processing stages are affected similarly. For example, if a between-subjects variable (such as age) primarily influences signal detection or motor execution, but the effect of interest is situated at a response-selection level, then using proportional scores will reduce the effect size. In sum, based on the various RT analyses (both with and without incorrect NEXT trials), we cannot confidently conclude that the instruction-based interference effect decreased with age, but we can certainly conclude that it did not *increase* (as predicted by the advance-implementation account).

**Table S2:** Overview of the descriptive statistics for proportional scores. CI = confidence interval.

| Age   | NEXT proportional RT<br>(all NEXT trial included) |      |          |          | NEXT proportional RT<br>(only correct NEXT trials) |      |          |          |
|-------|---------------------------------------------------|------|----------|----------|----------------------------------------------------|------|----------|----------|
|       | M                                                 | SD   | lower CI | upper CI | M                                                  | SD   | lower CI | upper CI |
| 4     | 1.28                                              | 0.36 | 0.97     | 1.58     | 1.22                                               | 0.34 | 0.94     | 1.51     |
| 5     | 1.18                                              | 0.23 | 1.08     | 1.28     | 1.11                                               | 0.20 | 1.02     | 1.19     |
| 6     | 1.17                                              | 0.22 | 1.08     | 1.26     | 1.12                                               | 0.14 | 1.07     | 1.18     |
| 7     | 1.17                                              | 0.35 | 1.00     | 1.33     | 1.11                                               | 0.27 | 0.98     | 1.23     |
| 8     | 1.16                                              | 0.22 | 1.08     | 1.25     | 1.09                                               | 0.17 | 1.02     | 1.15     |
| 9     | 1.24                                              | 0.33 | 1.12     | 1.37     | 1.12                                               | 0.14 | 1.07     | 1.18     |
| 10    | 1.07                                              | 0.09 | 1.02     | 1.12     | 1.04                                               | 0.11 | 0.98     | 1.10     |
| 11    | 1.14                                              | 0.13 | 1.07     | 1.21     | 1.11                                               | 0.13 | 1.04     | 1.18     |
| 17-19 | 1.23                                              | 0.20 | 1.15     | 1.30     | 1.15                                               | 0.17 | 1.09     | 1.21     |

## SUPPLEMENTARY MATERIALS

**Table S3:** Overview of the ANOVAs used to explore the effect of age on proportional interference-based scores. Age was a continuous numerical variable; thus,  $df_1 = 1$ . Consistent with the main analyses, we performed the analyses with and without the adolescents.

|                                | <i>Df</i> | <i>Sum of squares effect</i> | <i>Sum of squares error</i> | <i>F</i> | <i>p</i> | <i>generalized <math>\eta^2</math></i> |
|--------------------------------|-----------|------------------------------|-----------------------------|----------|----------|----------------------------------------|
| Adolescents included           |           |                              |                             |          |          |                                        |
| NEXT RT<br>(all NEXT included) | 1,194     | 0.014                        | 12.154                      | 0.231    | 0.631    | 0.001                                  |
| NEXT RT<br>(correct NEXT only) | 1,194     | 0.009                        | 6.400                       | 0.258    | 0.612    | 0.001                                  |
| Only children                  |           |                              |                             |          |          |                                        |
| NEXT RT<br>(all NEXT included) | 1,164     | 0.051                        | 10.876                      | 0.773    | .381     | 0.005                                  |
| NEXT RT<br>(correct NEXT only) | 1,164     | 0.051                        | 5.503                       | 1.528    | .218     | 0.009                                  |

### Overview of the pilot study

30 undergraduate students from the University of Exeter participated in a pilot study, for partial course credit or monetary compensation (£2.5). One subject was excluded because accuracy in the GO phase was below 60%. The apparatus, stimuli, and procedure were the same as in the main experiment.

The descriptive and inferential statistics appear in Tables S4 and S5, respectively. As can be seen, we observed robust compatibility effects in the NEXT phase, and switch costs in the GO phase. We observed the same pattern of results for all age groups in the main experiment.

**Table S4:** Overview of the descriptive statistics for the NEXT and GO phases.

|    | NEXT       |     | NEXT RT            |     | NEX RT         |     | GO         |      | GO RT          |     |
|----|------------|-----|--------------------|-----|----------------|-----|------------|------|----------------|-----|
|    | Error rate |     | (all trials incl.) |     | (only correct) |     | Error rate |      | (only correct) |     |
|    | C          | IC  | C                  | IC  | C              | IC  | GO1        | GO2  | GO1            | GO2 |
| M  | .007       | .14 | 570                | 728 | 565            | 663 | .075       | .049 | 569            | 482 |
| SD | .02        | .13 | 128                | 176 | 118            | 153 | .052       | .045 | 80             | 55  |

Note: For the NEXT phase, C = compatible, IC = incompatible. For the GO phase, GO1 = the first GO trial, GO2 = the second GO trial.

**Table S5:** Overview of NEXT (incompatible vs. compatible) and GO (first vs. second GO trials) analyses.  $Df = 28$  for all test. See the main manuscript for a description of the Bayes factors (BF).

|                                    | <i>diff</i> | <i>lower CI</i> | <i>upper CI</i> | <i>t</i> | <i>p</i> | <i>BF</i>          | <i><math>g_{av}</math></i> |
|------------------------------------|-------------|-----------------|-----------------|----------|----------|--------------------|----------------------------|
| NEXT Error rate                    | 0.13        | 0.081           | 0.18            | 5.407    | < .001   | 2305               | 1.693                      |
| NEXT RT (all NEXT trials included) | 158         | 93              | 224             | 4.956    | < .001   | 750                | 1.027                      |
| NEXT RT (correct NEXT trials only) | 97          | 40              | 155             | 3.481    | .002     | 21                 | 0.711                      |
| GO error rate                      | 0.07        | 0.011           | 0.043           | 3.408    | .002     | 18                 | 0.537                      |
| GO RT (correct GO trials only)     | 87          | 70              | 104             | 10.486   | < .001   | $2.82 \times 10^8$ | 1.271                      |
